# Supplementary material for: Germ-line transmission of trisomy 21: Data from 80 families suggest an implication of grandmaternal age and a high frequency of female-specific trisomy rescue
Source: Springer Nature journal article supplement (doi:10.1186/1755-8166-3-7), 2010-01-01
Supplement: Additional file 1 [file 1755-8166-3-7-s1.doc]

Table 1. Detailes of families with maternal trisomy 21 gonadal mosaicism

| Case  No | Source | Indication for the testing of the carrier for the presence of abnormal line | Proportion of trisomic cell line; method of germ mosaicism ascertainment | Maternal age at birth/conception of DS child/fetus, yr | | Grandparental ages at birth of the carrier (mat/pat), yr | Outcome of carrier's pregnancies | Trisomy 21 offspring with reported sex | | | | | | Comments |
| --- | --- | --- | --- | --- | --- | --- | --- | --- | --- | --- | --- | --- | --- | --- |
| Postnatal diagnosis | | Prenatal diagnosis | | Miscarriage | |
| male | female | male | female | male | female |
| 1 | Aarskog, 1969 [51] | recurrent T21 offspring | 5% BL | 22, 24 | | 39/45 | I and II - T21 child | 2 |  |  |  |  |  |  |
| 2 | Ban et al., 2003 [42] (family member II/3) | multiple T21 conceptions in the two nuclear families from the same pedigree | 0% BL, DNA studies, GM inferred from isoUPD21pat  (rescue of inherited trisomy) | 30, 32 | | ns | I and II - T21 fetus |  |  | 1 |  |  |  | Maternal father (family member 1/3) showed isoUPD21, suggesting mosaicism in three successive generations (grandgrandparental, grandpaternal, and maternal) |
| 3 | Ban et al., 2003 [42] (family member I/2, the aunt of the case II/3) | 0% BL, DNA studies, GM inferred from isoUPD21 (rescue of inherited trisomy) | ns | | ns | I - T21 child | 1 |  |  |  |  |  | The mother showed the isoUPD as her brother I/3, suggesting mosaicism in two generations |
| 4 | Blank et al., 1962 [52] | features of DS, child with T21 | 14% BL | 28 | | 40/42 | T21 child |  | 1 |  |  |  |  |  |
| 5 | Bruyere et al., 2000 [53] | study on parental origin of T21 in the mosaic child | 0% BL, DNA studies, GM (MII NDJ) inferred from UPD21 in the euploid line of the mosaic child | 22, 31 | | ns | I - T21 child, II - SA, III - T21 fetus, IV - 46,XX child |  | 1 | 1 |  |  |  | Mosaic 46/47,+21 female child, loss of the paternal chromosome in the euploid line |
| 6 | Butomo, Kovaleva, 1993 [29] (case 11) | recurrent T21 | 1.6% BL, GM (rescue of MI trisomy) proved by QFQ-polymorphism study | 29, 38, ns, ns | | ns | I - DS child, II - SA, III - T21 child, IV and V - T21 fetus | 1 | 1 | 2 |  |  |  | Clinical diagnosis in male child |
| 7 | Buzhievskaya et al., 1987 [41] (case 1) | ns | 5.8% 47,+21; 90.6% 47,+r(21)(p11;q11) BL | 26 | | ns | T21 child followed by normal female |  | 1 |  |  |  |  | Mosaicism in two successive generations (the mother and the maternal grandmother) |
| 8 | Cozzi et al., 1999 [36] | recurrent T21 conceptions | 0% BL, 70% ovulated oocytes, GM (mitotic NDJ) proved by DNA and cytogenetic markers | 32, ns, 36 | | ns | normal child followed by T21 child and two T21 fetuses | 1 |  |  |  |  |  |  |
| 9 | Cui et al., 2007 [54] | recurrent T21 | 0% BL, 4% SF, maternal origin of T21 in both conceptions confirmed by DNA analysis | 21, 27 | | ns | T21 child and T21 fetus |  | 1 |  | 1 |  |  |  |
| 10 | Dhadial and Pfeiffer, 1972 [55] | recurrent T21 | 5% BL, 0% SF | 21, 24 | | 27/40 | I - normal male, II - SA, III and IV - T21 child |  | 2 |  |  |  |  |  |
| 11 | English et al., 2001 [56]; personal communication, 2008 | recurrent T21 conceptions | 0% BL, DNA study result is consistent with the presence of GM (rescue of trisomy MI) | 20, 23 | | 21/24 | I - T21 fetus, II - normal female, III - T21 fetus, IV - 46,XY fetus |  |  | 1 | 1 |  |  |  |
| 12 | Ferrier, 1964 [57] (case 1) | ns | 28.6% BL, 21.6% SF | 25 | | 27/34 | I - T21 child | 1 |  |  |  |  |  |  |
| 13 | Fitzgerald et al., 1986 [58] | recurrent T21 offspring | 4% BL, 6% SF | 24, 26, 28 | | ns | I - T21 child, II and IV - T21 fetus, III - normal female | 1 |  |  |  |  |  |  |
| 14 | Frias et al., 2002 [59] (case P4) | study on prevalence of GM in young parents of DS children | 1.7% BL | 33 | | ns | three SA, T21 child |  | 1 |  |  |  |  |  |
| 15 | Fujita et al., 1992 [60] | multiple recurrence of T21 | 0% BL, 4-10% SF | ns, ns, 27 | | ns | two T21 children and T21 fetus | 1 |  |  | 1 |  |  |  |
| 16 | Gomirato-Sandrucci et al., 1971 [61] | recurrent T21 offspring | 5% ns | 19, 23 | | ns | two T21 children | 2 |  |  |  |  |  |  |
| 17 | Goodwin, Kousseff, 1986 [62] | recurrent T21 | 1%BL, 18% SF | 24, ns | | ns | two T21 children | 1 | 1 |  |  |  |  |  |
| 18 | Harris et al., 1982 [23] | recurrent T21 | 10% BL, 5% SF; maternal origin (mitotic NDJ or rescue of MII trisomy) proved by study of QFQ-polymorphism | under 30 | ns | | I - normal male, II-IV - T21 child | 2 | 1 |  |  |  |  |  |
| 19 | Ives et al., 1997 [30] | multiple recurrence of T21 | 8% BL, 5% SF, 100% cultured ovarian tissue, 0% oocytes | 21, ns….., 27 | 18 | | I-III - T21 child, IV-VII - T21 fetus, VIII-X - SA |  | 3 | 1 | 2 | 1 |  |  |
| 20 | Izakovic, Getlik, 1969 [63] | child with T21 | 21% BL | 27 | ns | | normal male and normal female followed by T21 child |  | 1 |  |  |  |  |  |
| 21 | James et al., 1998 [64] (family E) | multiple T21 pregnancies | 0.5% BL, 3% SF, DNA study revealed rescue of MI trisomy | 28, 32, 33 | ns | | I - DS child, II - normal male, III and IV - T21 fetus, V - 46,XX fetus |  | 1 | 1 | 1 |  |  |  |
| 22 | James et al., 1998 [64] (family F) | 4% BL | 23, 24, 29 | ns | | I - T21 child, II and IV - T21 fetus, III - normal male | 1 |  | 2 |  |  |  |  |
| 23 | Kaffe et al., 1974 [65] | recurrence of T21 | 22% BL | 25, 39 | >37 | | I - T21 child, II-IV normal child, V and VI - SA, VII - normal male, VIII - T21 child | 1 | 1 |  |  |  |  |  |
| 24 | Kovaleva, Tahmasebi-Hesari, 2007 [66] (family ZH) | study on parental origin of T21 in 151 consecutive families | 4% BL | 24, 28 | ns | | two DS children | 2 |  |  |  |  |  | Clinical diagnosis in one child |
| 25 | Kovaleva, Tahmasebi-Hesari, 2007 [66] (famuly UL) | 0.8% blood, GM (rescue of MI trisomy) confirmed by QFQ-polymorphism study | 24, 25, 28, 29 | 29/30 | | I and II - SA, III - normal male, IV – IA, V and VI - T21 child, VII and VIII - T21 fetus | 2 |  |  | 2 |  |  |  |
| 26 | Krishna Murthy, Farag, 1995 [67] (family 1) | multiple recurrence of T21 | 0.9% BL | 18, 19, 25 | ns | | I, II, and VI - T21 child, III - normal female, IV and V - SA | 2 | 1 |  |  |  |  | Mosaic 46/47,+21 female child |
| 27 | Krmpotik, Hardin, 1971 [68] | child with T21, multiple miscarriages | 10% BL | 33 | ns | | I - IX - three SA and six normal children, X - T21 child |  | 1 |  |  |  |  |  |
| 28 | Kuo, 2002 [47] (case 1) | study of 1,010 couples with a history of recurrent SA | 4% BL, 13% SF | 30 | ns | | I - 46,XX SA, II - T21 SA, III - 46,XY child |  |  |  |  | 1 |  |  |
| 29 | Kuo, 2002 [47] (case 2) | 8% BL, 5% SF, 100% cultured ovarian tissue, 0% oocytes | 26 | ns | | I and II - SA, III - T21 SA, IV - 46,XX child, V - 46,XY SA, VI - 45,XY, -21 SA |  |  |  |  |  | 1 |  |
| 30 | LRMG logbook (family DR) | child with T21, parental anxiety | low level, BL | 18 | ns | | T21 child, 46,XY child | 1 |  |  |  |  |  |  |
| 31 | LRMG logbook (family MI) | child with T21, parental anxiety | 1.4% BL | 28 | ns | | T21 child | 1 |  |  |  |  |  |  |
| 32 | LRMG logbook (family PR) | child with T21, parental anxiety | 8% BL | 24 | ns | | T21 child | 1 |  |  |  |  |  |  |
| 33 | Makino, 1964 [69] | search for GM in families with T21 | BL | 29 | ns | | T21 child | 1 |  |  |  |  |  |  |
| 34 | Mikkelsen et al., 1970 [70] | survey of patients with DS born to young mothers | 3% BL, 13% SF | 20, 29 | 22/28 | | I – T21 child, II – SA, III – T21 child | 1 | 1 |  |  |  |  |  |
| 35 | MRCC, 1977 [71] (case 342) | ns | 9% BL, 22% and 84% ovaries | ns | ns | | T21 fetus |  |  |  | 1 |  |  |  |
| 36 | Nielsen et al., 1988 [28] | multiple recurrence of T21 | 0% BL and SF, 15% ovary, rescue of MI trisomy revealed by QFQ polymorphism study | 23, 25, 26, 27, 28, 30 | ns | | I - male with no DS features, died, II and V - DS child, IV and VI - T21 child, III - SA, VII and IX - T21 fetus, VIII, X, and XI - IA | 2 | 2 | 1 | 1 |  |  | Clinical diagnosis in one male child and in stillborn girl |
| 37 | Nuzzo et al., 1975 [72] | recurrent T21 | 0% BL, 0.9% SF | 30, 32 | 29 | | I - T21 child, II - T21 twins | 2 |  |  |  |  |  | Twins as single entry |
| 38 | Osuna, Moreno, 1977 [73] | multiple recurrence of T21 | 6% BL | 24, 27, 29 | 26/23 | | normal male followed by three T21 children | 1 | 2 |  |  |  |  |  |
| 39 | Pangalos et al., 1992 [43] (family RDS-09) | study on origin of T21 in families with recurrence of T21 | 2% BL, maternal origin (rescue of MI trisomy) confirmed by DNA analysis | 26, 29 | ns | | I and II - T21 child |  | 2 |  |  |  |  |  |
| 40 | Pangalos et al., 1992 [43] (family RDS-10) | 2% BL, maternal origin confirmed by DNA analysis | 28, 32 | ns | | I - T21 child, II -SA, III - normal female, IV - T21 fetus | 1 |  | 1 |  |  |  |  |
| 41 | Pangalos et al., 1992 [43] (family RDS-13) | 0% BL, GM (rescue of MI trisomy) inferred from DNA analysis | 25, 29 | ns | | I and III - T21 child, II - normal female | 1 | 1 |  |  |  |  |  |
| 42 | Pangalos et al., 1992 [43] (family RDS-14) | 0% BL, GM (rescue of MI trisomy) inferred from DNA analysis | 36, 38 | ns | | I and II - T21 fetus |  |  | 1 | 1 |  |  |  |
| 43 | Parke et al., 1980 [9] | poor reproductive history, child with T21 | 2% BL, 0% SF, 6% ovarian fibroblastic cells | 24 | ns | | I-III - SA, IV - T21, V and VI - normal 46,XX child |  | 1 |  |  |  |  | Mosaic 46/47,+21 female child |
| 44 | Raichs and Tamparillas, 1967 [74] | child with T21 | 20% BL | 27 | 36 | | T21 child | 1 |  |  |  |  |  | Mosaic 46,XY,i(121q)/47,XY,+21 |
| 45 | Rowe et al., 1989 [75] | Alzheimer disease, child with T21 | 10% ns | 26 | ns | | T21 child |  | 1 |  |  |  |  |  |
| 46 | Sachs et al., 1990 [34] (family B) | multiple recurrence of T21 | 3% BL, 14% SF, 44% and 47% ovaries | ns | ns | | I - T21 child, II, VI, and VII - T21 fetus, III-V - SA, VIII - 46,XY fetus |  | 1 |  | 1 |  | 2 | Two mosaic 46/47,+21 miscarried female fetuses |
| 47 | Smith et al., 1962 [76] | recurrent T21 | 27% BL, 75% SF | ns, 19 | ns | | two T21 children | 2 |  |  |  |  |  |  |
| 48 | SPCMG logbook (family BR) | poor reproductive history, child with T21 | 15% BL | 29 | ns | | I, III, and IV - IA, II - mole, V - T21 child, VI - 46,XY fetus |  | 1 |  |  |  |  |  |
| 49 | SPCMG logbook (family PA) | child clinically diagnosed as DS, dead | 2% BL | 28 | ns | | I - normal female, II-IV - IA, V - child with DS | 1 |  |  |  |  |  | Clinical diagnosis |
| 50 | SPCMG logbook  (family SH) | child with T21, parental anxiety | 4% BL | 26 | ns | | T21 child | 1 |  |  |  |  |  |  |
| 51 | SPCMG logbook (family SO) | child with T21, parental anxiety | 4% BL | 38 | ns | | I-IV - IA, V - normal female, VI - T21 child |  | 1 |  |  |  |  | Mosaic 46/47,+21 female child |
| 52 | SPCMG logbook (family UV) | poor reproductive history, child with T21 | BL | 41 | ns | | three SA, T21 child |  | 1 |  |  |  |  |  |
| 53 | Street et al., 2007 [77], personal communication, 2009 | previous pregnancy with T21 | 1.5% BL; T21 maternal cell contamination of an amniotic fluid specimen from a normal male pregnancy | 33 | ns | | I and II - SB and normal livebirth, III - SA, IV - T21 fetus, V - normal 46,XY child |  |  | 1 |  |  |  |  |
| 54 | Sutherland et al., 1972 [78] | multiple resurrence of T21, some stigmata of DS | 0% BL, 0% bone marrow; 6% further BL culture | ns | ns | | three T21 children | 3 |  |  |  |  |  |  |
| 55 | Taylor, 1970 [32] | child with T21 | 6% BL, 6% SF; 89% and 92% in fibroblasts-like cells from ovaries | ns | ns | | T21 child | 1 |  |  |  |  |  |  |
| 56 | Timson et al., 1971 [79] | ns | 10% BL | 26 | ns | | T21 child followed by normal 46,XX | 1 |  |  |  |  |  |  |
| 57 | Tseng et al., 1994 [35] | multiple recurrence of T21 | 0% BL, 40% right ovary | 22, 23, 27 | ns | | I - T21 child, II - DS child, III - T21 child, IV and V - IA, VI - normal 46,XY child | 1 | 2 |  |  |  |  | Clinical diagnosis in the female child |
| 58 | Uchida, Freeman, 1985 [33] (family 6) | study on parental mosaicism in a random series of 374 families | 2% BL | 27, 29, 31 | ns | | three T21 children | 3 |  |  |  |  |  |  |
| 59 | Verresen et al., 1964 [80] | ns | 10% BL | 30 | 34 | | normal male, T21 child | 1 |  |  |  |  |  |  |
| 60 | Weinstein, Warkany, 1963 [81] | child with T21 | 17% BL, 18% SF | 17 | 39 | | I - T21 child | 1 |  |  |  |  |  |  |
| 61 | Werner et al., 1982 [10] | child with T21, some stigmata of DS | 31% BL, rescue of MI trisomy revealed by QFQ polymorphism | 31 | 43/46 | | I and IV - SA, II - normal male, III - T21 child, | 1 |  |  |  |  |  | Mosaicism in two successive generations (the mother and the maternal grandmother) |
| ***All maternally derived cases, n*** | | | | | | | ***19 males and 16***  ***females unaffected*** | ***50*** | ***34*** | ***13*** | ***12*** | ***2*** | ***3*** | ***6 /108=5.6 % affected individuals/fetuses with 46/47,+21 mosaicism*** |
| ***Sex ratio*** | | | | | | | ***1.2*** | ***1.5*** | | ***1.08*** | | ***0.67*** | |

BL: blood sample

IA: induced abortion

QFQ polymorphism: chromosome 21 short arm polymorphism identified by QFQ-banding technique

SA: spontaneous abortion

SB: stillborn

SF: skin fibroblasts
