# Supplementary material for: Germ-line transmission of trisomy 21: Data from 80 families suggest an implication of grandmaternal age and a high frequency of female-specific trisomy rescue
Source: Springer Nature journal article supplement (doi:10.1186/1755-8166-3-7), 2010-01-01
Supplement: Additional file 2 [file 1755-8166-3-7-s2.doc]

Table 2. Detailes of families with paternal trisomy 21 gonadal mosaicism

| Case  No | Source | Indication for the testing of the carrier for the presence of abnormal line | Proportion of trisomic cell line; method of germ mosaicism ascertainment | Maternal age at birth/conception of DS child/fetus, yr | Grandparental ages at birth of the carrier (mat/pat), yr | Outcome of carrier's pregnancies | Trisomy 21 offspring with reported sex | | | | | | Comments |
| --- | --- | --- | --- | --- | --- | --- | --- | --- | --- | --- | --- | --- | --- |
| Postnatal diagnosis | | Prenatal diagnosis | | Miscarriage | |
| male | female | male | female | male | female |
| 1 | Casati et al., 1992 [11] | chromosome fragility study in patients with xeroderma pigmentosusm | 2% BL, 0% SF; paternal origin (rescue of MII trisomy or mitotic NDJ) confirmed by study of QFQ polymorphism | 28/29 | 41/47 | T21 child followed by normal male | 1 |  |  |  |  |  | Mosaic 46/47,+21 non-DS male child with xeroderma pigmentosum |
| 2 | Domany, Metneki, 1976 [82] (case L.K.) | child clinically diagnosed as DS, dead | 15% BL | 27/27 | ns | I - T21 child | 1 |  |  |  |  |  |  |
| 3 | Frias et al., 2002 [59] (case P19) | study on prevalence of GM in young parents of DS children | 1.5% BL | 24/33 | ns | T21 child |  | 1 |  |  |  |  |  |
| 4 | Frias et al., 2002 [59] (case P24) | 1.3% BL | 25/26 | ns | two T21 children, SB malformed male, normal female | 1 | 1 |  |  |  |  |  |
| 5 | Frias et al., 2002 [59] (case P25) | 1.5% BL | 25/25 | ns | two T21 children, two SA, normal female, unaffected SB female | 1 | 1 |  |  |  |  |  |
| 6 | Hsu et al., 1971 [83] (family D) | child with T21 | 6% BL | 22/21 | 30/40 | I - T21 child | 1 |  |  |  |  |  |  |
| 7 | Hsu et al., 1971 [83] (family K) | child with T21 | 4.6% BL, 4% SF | 28/30 | 19/22 | I - T21 child | 1 |  |  |  |  |  |  |
| 8 | Hsu et al., 1971 [83] (family N) | recurrent T21 | 0% BL, 7.5% SF, 4% testicular biopsy fibroblast culture, 60% spermatogonial metaphases | 19/23, 21/25 | 35/45 | I - normal female, II and III - T21 child | 1 | 1 |  |  |  |  |  |
| 9 | Kovaleva, Tahmasebi-Hesari, 2007 [66] (family A-K) | study on parental origin of T21 in 151 consecutive families | 0% BL, rescue of MI trisomy revealed by study of QFQ polymorphism | 32/29 | 27/28 | I - normal female, II - IA, III - T21 child | 1 |  |  |  |  |  |  |
| 10 | Kovaleva, Tahmasebi-Hesari, 2007 [66] (family ST) | 4% blood | 24/23 | 32/34 | I - T21 child | 1 |  |  |  |  |  |  |
| 11 | Kovaleva and Tahmasebi-Hesari, 2007 [66] (family V) | 1% blood, rescue of MI trisomy revealed by study of QFQ polymorphism | 31/38 | ns | I - normal female, II - IA, III - T21 child | 1 |  |  |  |  |  |  |
| 12 | Massimo et al., 1967 [83] Mattei et al., 1974 [84] | ns | 21.5% blood | 35/ns | 30 | two T21 children | 1 | 1 |  |  |  |  |  |
| 13 | Mehes, 1973 [85] | child with T21 | 7% blood | 22/23 | 31/36 | I - T21 child | 1 |  |  |  |  |  |  |
| 14 | Pangalos et al., 1992 [43] (family RDS-02) | study on the origin of T21 in families with recurrence of T21 | 2% blood, paternal origin of T21 confirmed by DNA analysis | 28/34, 34/40 | ns | I - normal male, II, III, and V - normal female, IV and VI - T21 | 1 | 1 |  |  |  |  |  |
| 15 | Papp et al., 1974 [86] | child with T21 | 6% blood | 19/30 | 33/32 | I - T21 child, II - normal female |  | 1 |  |  |  |  |  |
| 16 | Sachs et al., 1990 [34] (family A) | multiple recurrence of T21 | 22% blood | ns | ns | I and IV - SA, II - T21 child, III - T 21 fetus, V - T21 SA, VI - 46,XX fetus |  | 1 |  | 1 |  | 1 | Mosaic 46/47,+21 miscarried female fetus |
| 17 | Soltan et al., 1964 [87] | study on families with T21 recurrence | % ns BL | 38/32, 41/35 | 41/35 | two DS children | 2 |  |  |  |  |  | Clinical diagnosis in one child |
| 18 | De Toni et al., 1967 [88] | recurrent T21 | ns | ns | ns | two T21 children, no healthy children | 1 | 1 |  |  |  |  |  |
| 19 | Walker, Ising, 1969 [89] | DS features, child with T21 | 30% blood | ns | ns | T21 child |  | 1 |  |  |  |  | Mosaic 46/47,+21 female child |
| ***All paternally derived cases, n*** | | | | | | ***3 ales and 11***  ***females unaffected*** | ***16*** | ***10*** | ***0*** | ***1*** | ***0*** | ***1*** | ***2/27=7.2 % affected child/fetus with 46/47,+21 mosaicism*** |
| ***Sex ratio*** | | | | | | ***0.27*** | ***1.6*** | |  | |  | |

BL: blood sample

IA: induced abortion

QFQ polymorphism: chromosome 21 short arm polymorphism identified by QFQ-banding technique

SA: spontaneous abortion

SB: stillborn

SF: skin fibroblasts
